# Supplementary material for: Essential Role of CFAP53 in Sperm Flagellum Biogenesis
Source: Front Cell Dev Biol. 2021 May 28;9:676910. doi: 10.3389/fcell.2021.676910 (PMC8195676; doi:10.3389/fcell.2021.676910)
Supplement: Supplementary file 14 [file Data_Sheet_11.ZIP]

Archive with 17 entries (16 files):
- Fig6G/
- Fig6G/CFAP53 TRITC IFT88 FITC.lif_11 4.tif
- Fig6G/CFAP53 TRITC IFT88 FITC.lif_11 4_ch00.tif
- Fig6G/CFAP53 TRITC IFT88 FITC.lif_11 4_ch01.tif
- Fig6G/CFAP53 TRITC IFT88 FITC.lif_11 4_ch02.tif
- Fig6G/CFAP53 TRITC IFT88 FITC.lif_13 14_z5.tif
- Fig6G/CFAP53 TRITC IFT88 FITC.lif_13 14_z5_ch00.tif
- Fig6G/CFAP53 TRITC IFT88 FITC.lif_13 14_z5_ch01.tif
- Fig6G/CFAP53 TRITC IFT88 FITC.lif_13 14_z5_ch02.tif
- Fig6G/CFAP53 TRITC IFT88 FITC.lif_9_Processed001.tif
- Fig6G/CFAP53 TRITC IFT88 FITC.lif_9_Processed001_ch00.tif
- Fig6G/CFAP53 TRITC IFT88 FITC.lif_9_Processed001_ch01.tif
- Fig6G/CFAP53 TRITC IFT88 FITC.lif_9_Processed001_ch02.tif
- Fig6G/cfap53 WT M5 15 tritc tub fitc.lif_Series006_Processed001.tif
- Fig6G/cfap53 WT M5 15 tritc tub fitc.lif_Series006_Processed001_ch00.tif
- Fig6G/cfap53 WT M5 15 tritc tub fitc.lif_Series006_Processed001_ch01.tif
- Fig6G/cfap53 WT M5 15 tritc tub fitc.lif_Series006_Processed001_ch02.tif
